# Supplementary material for: Geographical Differences in the Population-Based Cross-Sectional Growth Curve and Age at Peak Height Velocity with respect to the Prevalence Rate of Overweight in Japanese Children
Source: Hindawi journal article supplement (doi:10.1155/2014/867890), 2014-01-01
Supplement: f1 [file 867890.f1.pdf]

**Table S1.** Standardized weight of 5- to 9-year-old Japanese children in each prefecture averaged over an 8-year period (2006–2013).

| No. | Prefecture | Standardized weight (Males) |       |       |       |       | Standardized weight (Females) |       |       |       |       |
|-----|------------|-----------------------------|-------|-------|-------|-------|-------------------------------|-------|-------|-------|-------|
|     |            | Age:5                       | 6     | 7     | 8     | 9     | Age:5                         | 6     | 7     | 8     | 9     |
| 1   | Hokkaido   | 0.48                        | 1.11  | 1.04  | 1.29  | 1.53  | 0.54                          | 0.80  | 0.73  | 1.10  | 1.47  |
| 2   | Aomori     | 2.17                        | 2.28  | 2.80  | 2.67  | 2.17  | 2.27                          | 2.42  | 2.13  | 2.59  | 2.56  |
| 3   | Iwate      | 1.55                        | 1.82  | 1.79  | 1.77  | 1.62  | 1.45                          | 1.92  | 1.70  | 1.69  | 2.07  |
| 4   | Miyagi     | 1.68                        | 1.44  | 1.19  | 1.27  | 1.68  | 1.76                          | 1.18  | 1.88  | 1.31  | 1.08  |
| 5   | Akita      | 2.14                        | 2.30  | 2.44  | 2.48  | 2.53  | 1.84                          | 2.25  | 2.51  | 2.54  | 2.50  |
| 6   | Yamagata   | 1.34                        | 1.42  | 1.85  | 1.89  | 1.62  | 1.37                          | 1.22  | 1.55  | 1.24  | 0.90  |
| 7   | Fukushima  | 1.64                        | 1.59  | 0.97  | 1.23  | 1.63  | 1.36                          | 0.88  | 1.21  | 1.16  | 0.99  |
| 8   | Ibaraki    | 1.13                        | 0.88  | 0.80  | 0.56  | 0.83  | 1.11                          | 0.74  | 0.56  | 0.71  | 0.55  |
| 9   | Tochigi    | 0.65                        | 0.66  | 0.77  | 0.82  | 0.74  | 0.66                          | 0.72  | 0.87  | 0.85  | 0.60  |
| 10  | Gunma      | 0.91                        | 0.49  | 0.50  | 0.50  | 0.28  | 0.91                          | 0.41  | 0.51  | 0.14  | 0.23  |
| 11  | Saitama    | -0.18                       | 0.12  | -0.16 | -0.27 | -0.16 | 0.13                          | -0.18 | -0.15 | -0.23 | -0.33 |
| 12  | Chiba      | 0.37                        | 0.07  | 0.03  | -0.12 | 0.22  | 0.37                          | 0.04  | -0.39 | 0.08  | -0.28 |
| 13  | Tokyo      | 0.23                        | -0.10 | -0.17 | -0.16 | -0.10 | -0.04                         | -0.22 | -0.33 | -0.53 | -0.35 |
| 14  | Kanagawa   | -0.07                       | -0.56 | -0.58 | -0.63 | -0.57 | 0.06                          | -0.26 | -0.42 | -0.64 | -0.79 |
| 15  | Niigata    | 0.78                        | 0.54  | 0.38  | 0.50  | 0.80  | 0.77                          | 0.42  | 0.55  | 0.63  | 0.46  |
| 16  | Toyama     | 0.19                        | 0.03  | 0.30  | 0.51  | 0.41  | -0.27                         | 0.10  | 0.07  | 0.72  | 0.51  |
| 17  | Ishikawa   | -0.42                       | -0.07 | 0.34  | 0.13  | 0.26  | -0.49                         | 0.18  | 0.08  | 0.16  | -0.07 |
| 18  | Fukui      | -0.09                       | 0.23  | -0.13 | 0.15  | 0.00  | -0.48                         | 0.04  | -0.31 | -0.10 | 0.13  |
| 19  | Yamanashi  | -0.18                       | -0.24 | -0.18 | -0.20 | 0.05  | -0.13                         | -0.35 | -0.53 | -0.21 | 0.02  |
| 20  | Nagano     | -0.78                       | -0.75 | -0.69 | -0.88 | -0.81 | -0.57                         | -0.83 | -1.14 | -0.87 | -1.40 |
| 21  | Gifu       | 0.02                        | -0.46 | -0.43 | -0.59 | -0.43 | -0.34                         | -0.95 | -0.56 | -0.95 | -0.53 |
| 22  | Shizuoka   | -0.69                       | -1.03 | -0.84 | -0.91 | -0.94 | -0.75                         | -0.98 | -0.91 | -0.83 | -0.86 |
| 23  | Aichi      | -0.72                       | -0.83 | -0.89 | -0.75 | -1.02 | -0.88                         | -1.04 | -0.52 | -0.87 | -0.91 |
| 24  | Mie        | -0.31                       | -0.24 | -0.31 | -0.32 | -0.66 | -0.49                         | -0.14 | -0.28 | -0.28 | -0.72 |
| 25  | Shiga      | -0.85                       | -0.34 | -0.52 | -0.63 | -0.79 | -0.70                         | -0.46 | -0.94 | -0.72 | -0.79 |
| 26  | Kyoto      | -0.82                       | -0.95 | -0.86 | -0.79 | -0.77 | -0.81                         | -1.05 | -0.62 | -0.66 | -0.72 |
| 27  | Osaka      | -0.30                       | -0.63 | -0.68 | -0.79 | -0.50 | -0.39                         | -0.72 | -0.53 | -0.49 | -0.73 |
| 28  | Hyogo      | -0.64                       | -1.03 | -1.04 | -0.95 | -0.79 | -0.60                         | -0.98 | -0.75 | -1.01 | -1.10 |
| 29  | Nara       | -0.56                       | -0.21 | -0.34 | -0.57 | -0.44 | -0.60                         | -0.29 | -0.13 | -0.22 | -0.45 |
| 30  | Wakayama   | -0.43                       | -0.25 | -0.50 | -0.35 | -0.19 | -0.49                         | -0.08 | -0.13 | -0.02 | -0.12 |
| 31  | Tottori    | -0.83                       | -0.20 | -0.35 | -0.24 | -0.44 | -0.81                         | -0.09 | -0.21 | -0.15 | -0.31 |
| 32  | Shimane    | -0.89                       | -1.07 | -0.74 | -0.86 | -1.00 | -0.81                         | -0.94 | -0.39 | -0.20 | -0.58 |
| 33  | Okayama    | -1.00                       | -0.86 | -0.54 | -0.88 | -0.68 | -0.78                         | -0.51 | -0.45 | -0.82 | -0.65 |
| 34  | Hiroshima  | -0.52                       | -0.59 | -0.86 | -0.62 | -0.63 | -0.37                         | -0.79 | -0.49 | -0.85 | -0.87 |
| 35  | Yamaguchi  | -0.81                       | -0.97 | -1.10 | -0.73 | -0.86 | -0.68                         | -0.94 | -1.19 | -0.92 | -0.94 |
| 36  | Tokushima  | 1.48                        | 0.42  | 0.61  | 0.65  | 0.68  | 1.42                          | 1.08  | 0.73  | 0.76  | 0.48  |
| 37  | Kagawa     | -0.43                       | -0.18 | -0.50 | -0.31 | -0.60 | -0.03                         | -0.28 | -0.08 | -0.58 | -0.13 |
| 38  | Ehime      | -0.43                       | -1.02 | -0.61 | -0.83 | -0.73 | -0.48                         | -0.63 | -1.32 | -0.63 | -0.57 |
| 39  | Koch       | -0.46                       | -0.44 | -0.13 | -0.56 | -0.36 | -1.05                         | -0.12 | -0.41 | -0.91 | -0.20 |
| 40  | Fukuoka    | -0.43                       | -0.36 | -0.80 | -0.59 | -0.78 | -0.32                         | -0.74 | -0.20 | -0.55 | -0.05 |
| 41  | Saga       | -0.34                       | -0.20 | -0.34 | -0.38 | -0.41 | 0.09                          | -0.16 | -0.21 | -0.69 | 0.04  |
| 42  | Nagasaki   | -0.52                       | -0.29 | -0.37 | -0.41 | -0.50 | 0.05                          | -0.08 | -0.25 | -0.22 | -0.38 |
| 43  | Kumamoto   | -0.04                       | 0.56  | 0.45  | 0.36  | 0.63  | 0.36                          | 0.51  | 0.47  | 0.63  | 0.40  |
| 44  | Oita       | -0.22                       | 0.30  | 0.30  | 0.09  | -0.19 | -0.45                         | 0.53  | 0.08  | -0.08 | 0.38  |
| 45  | Miyazaki   | -0.39                       | -0.21 | -0.14 | 0.23  | -0.05 | -0.26                         | -0.39 | -0.01 | 0.23  | 0.11  |
| 46  | Kagoshima  | -0.87                       | -1.08 | -0.67 | -0.81 | -0.69 | -1.04                         | -0.49 | -0.88 | -0.51 | -0.33 |
| 47  | Okinawa    | -0.93                       | -0.46 | -0.59 | -0.47 | -0.99 | -0.84                         | -0.26 | -0.29 | -0.28 | 0.22  |

**Table S2.** Standardized height of 5- to 9-year-old Japanese children in each prefecture averaged over an 8-year period (2006–2013).

| No. | Prefecture | Standardized height (Males) |       |       |       |       | Standardized height (Females) |       |       |       |       |
|-----|------------|-----------------------------|-------|-------|-------|-------|-------------------------------|-------|-------|-------|-------|
|     |            | Age:5                       | 6     | 7     | 8     | 9     | Age:5                         | 6     | 7     | 8     | 9     |
| 1   | Hokkaido   | 0.59                        | 0.93  | 0.61  | 0.60  | 0.82  | 0.55                          | 0.66  | 0.79  | 0.50  | 1.09  |
| 2   | Aomori     | 1.55                        | 1.63  | 2.27  | 2.05  | 1.65  | 1.55                          | 2.12  | 1.99  | 2.50  | 2.49  |
| 3   | Iwate      | 1.42                        | 1.33  | 0.92  | 1.17  | 1.14  | 1.35                          | 1.31  | 1.16  | 0.95  | 1.34  |
| 4   | Miyagi     | 1.14                        | 1.10  | 1.05  | 0.94  | 1.35  | 1.11                          | 1.30  | 1.24  | 0.89  | 0.94  |
| 5   | Akita      | 2.34                        | 2.28  | 2.33  | 2.35  | 2.49  | 2.13                          | 2.29  | 2.50  | 2.44  | 2.54  |
| 6   | Yamagata   | 1.22                        | 1.02  | 1.41  | 1.43  | 1.04  | 1.32                          | 0.92  | 1.03  | 0.95  | 0.80  |
| 7   | Fukushima  | 0.73                        | 0.58  | -0.07 | 0.43  | 0.74  | 0.75                          | 0.41  | 0.46  | 0.54  | 0.45  |
| 8   | Ibaraki    | 0.40                        | 0.39  | 0.30  | 0.11  | 0.54  | 0.28                          | -0.06 | 0.11  | 0.17  | 0.17  |
| 9   | Tochigi    | -0.20                       | 0.00  | -0.29 | -0.26 | -0.03 | 0.00                          | 0.11  | 0.07  | 0.11  | -0.22 |
| 10  | Gunma      | 0.23                        | -0.01 | 0.03  | 0.02  | -0.11 | 0.56                          | 0.04  | 0.08  | -0.10 | -0.60 |
| 11  | Saitama    | -0.21                       | 0.45  | 0.15  | 0.15  | 0.20  | -0.17                         | 0.26  | 0.13  | 0.24  | -0.07 |
| 12  | Chiba      | 0.31                        | 0.46  | 0.70  | 0.57  | 0.65  | 0.39                          | 0.43  | 0.46  | 0.49  | 0.36  |
| 13  | Tokyo      | 0.81                        | 0.94  | 0.80  | 1.09  | 0.86  | 0.46                          | 0.70  | 0.71  | 0.19  | 0.60  |
| 14  | Kanagawa   | 0.05                        | 0.42  | 0.34  | 0.36  | 0.20  | 0.09                          | 0.60  | 0.63  | 0.25  | -0.16 |
| 15  | Niigata    | 1.36                        | 1.38  | 1.24  | 1.04  | 1.36  | 1.72                          | 1.59  | 1.64  | 1.45  | 1.32  |
| 16  | Toyama     | 0.87                        | 0.46  | 0.85  | 1.02  | 0.70  | 0.68                          | 0.36  | 0.36  | 1.18  | 1.07  |
| 17  | Ishikawa   | 0.91                        | 0.55  | 0.81  | 0.70  | 0.90  | 0.45                          | 0.49  | 0.66  | 0.85  | 0.32  |
| 18  | Fukui      | 0.57                        | 0.42  | 0.15  | 0.74  | 0.85  | -0.13                         | 0.36  | 0.22  | 0.41  | 0.80  |
| 19  | Yamanashi  | -0.41                       | 0.04  | -0.13 | -0.19 | -0.34 | -0.50                         | -0.22 | -0.49 | -0.18 | -0.02 |
| 20  | Nagano     | -0.03                       | -0.07 | -0.09 | -0.44 | -0.50 | 0.08                          | 0.08  | -0.61 | -0.62 | -1.19 |
| 21  | Gifu       | 0.14                        | -0.35 | -0.12 | -0.36 | -0.30 | -0.14                         | -0.81 | -0.18 | -0.70 | -0.47 |
| 22  | Shizuoka   | -0.53                       | -1.23 | -0.91 | -0.75 | -0.80 | -0.61                         | -0.88 | -0.61 | -0.98 | -0.81 |
| 23  | Aichi      | -0.19                       | -0.46 | -0.66 | -0.43 | -0.86 | -0.46                         | -0.58 | -0.26 | -0.43 | -0.93 |
| 24  | Mie        | -0.17                       | 0.01  | 0.15  | -0.01 | -0.19 | -0.49                         | -0.01 | 0.10  | -0.22 | -0.39 |
| 25  | Shiga      | 0.09                        | 0.53  | 0.46  | 0.40  | 0.22  | 0.14                          | 0.12  | -0.16 | 0.17  | -0.01 |
| 26  | Kyoto      | 0.24                        | 0.02  | 0.04  | 0.21  | 0.16  | 0.36                          | 0.00  | 0.07  | 0.08  | 0.16  |
| 27  | Osaka      | 0.13                        | 0.10  | -0.18 | -0.12 | -0.15 | -0.02                         | -0.23 | -0.24 | -0.20 | -0.59 |
| 28  | Hyogo      | -0.11                       | -0.01 | -0.13 | -0.13 | -0.01 | -0.09                         | -0.21 | 0.00  | -0.44 | -0.42 |
| 29  | Nara       | -0.04                       | 0.42  | 0.40  | 0.17  | 0.20  | -0.36                         | 0.31  | 0.28  | 0.28  | 0.09  |
| 30  | Wakayama   | 0.13                        | -0.25 | -0.15 | -0.20 | -0.09 | 0.07                          | -0.08 | -0.27 | 0.00  | -0.34 |
| 31  | Tottori    | -0.16                       | 0.02  | 0.10  | 0.25  | 0.24  | -0.28                         | 0.30  | 0.22  | 0.15  | 0.19  |
| 32  | Shimane    | -0.52                       | -1.12 | -0.73 | -1.15 | -0.97 | -0.83                         | -1.23 | -0.79 | -0.78 | -0.92 |
| 33  | Okayama    | -0.70                       | -0.52 | -0.62 | -0.63 | -0.43 | -0.85                         | -0.34 | -0.44 | -0.49 | -0.51 |
| 34  | Hiroshima  | -0.76                       | -0.73 | -1.14 | -1.15 | -0.68 | -0.44                         | -1.26 | -0.90 | -1.13 | -1.26 |
| 35  | Yamaguchi  | -0.79                       | -1.61 | -1.43 | -1.28 | -1.24 | -0.82                         | -1.36 | -1.36 | -1.11 | -1.30 |
| 36  | Tokushima  | -0.16                       | 0.03  | 0.05  | 0.17  | 0.00  | 0.42                          | 0.35  | -0.03 | 0.15  | 0.00  |
| 37  | Kagawa     | -1.11                       | -0.30 | -0.70 | -0.51 | -0.83 | -0.98                         | -0.42 | -0.33 | -0.53 | -0.55 |
| 38  | Ehime      | -0.62                       | -1.28 | -0.55 | -0.88 | -1.18 | -0.68                         | -0.89 | -1.37 | -0.77 | -0.65 |
| 39  | Kochi      | -1.07                       | -0.82 | -0.77 | -0.85 | -0.91 | -1.43                         | -0.28 | -0.61 | -1.15 | -0.90 |
| 40  | Fukuoka    | -0.53                       | -0.42 | -0.86 | -0.57 | -0.53 | -0.41                         | -0.56 | -0.29 | -0.40 | 0.14  |
| 41  | Saga       | -0.58                       | -0.43 | -0.32 | -0.20 | -0.29 | -0.37                         | -0.47 | -0.59 | -0.91 | -0.07 |
| 42  | Nagasaki   | -0.98                       | -0.66 | -0.67 | -0.48 | -0.36 | -0.28                         | -0.43 | -0.57 | -0.13 | -0.23 |
| 43  | Kumamoto   | -0.07                       | -0.28 | 0.14  | -0.30 | -0.17 | 0.44                          | -0.11 | -0.13 | 0.19  | 0.17  |
| 44  | Oita       | -0.57                       | -0.53 | -0.39 | -0.63 | -0.68 | -0.47                         | -0.70 | -0.64 | -0.85 | -0.52 |
| 45  | Miyazaki   | -0.80                       | -0.94 | -0.71 | -0.32 | -0.41 | -0.63                         | -0.98 | -0.54 | -0.25 | -0.11 |
| 46  | Kagoshima  | -1.16                       | -1.62 | -1.48 | -1.49 | -1.38 | -1.26                         | -1.08 | -1.57 | -1.13 | -0.57 |
| 47  | Okinawa    | -2.36                       | -1.51 | -1.96 | -2.32 | -2.45 | -1.78                         | -1.57 | -1.56 | -1.32 | -0.85 |

**Table S3.** Standardized prevalence rate of overweight children in each prefecture averaged over an 8-year period (2006–2013).

| No. | Prefecture | Standardized prevalence rate of<br>overweight children (Males) |       |       |       |       | Standardized prevalence rate of<br>overweight children (Females) |       |       |       |       |
|-----|------------|----------------------------------------------------------------|-------|-------|-------|-------|------------------------------------------------------------------|-------|-------|-------|-------|
|     |            | Age:5                                                          | 6     | 7     | 8     | 9     | Age:5                                                            | 6     | 7     | 8     | 9     |
| 1   | Hokkaido   | 0.46                                                           | 1.36  | 1.24  | 1.23  | 1.34  | 0.53                                                             | 0.82  | 0.99  | 1.47  | 1.49  |
| 2   | Aomori     | 1.67                                                           | 1.86  | 2.19  | 2.40  | 2.04  | 1.95                                                             | 2.08  | 1.94  | 1.93  | 1.95  |
| 3   | Iwate      | 1.40                                                           | 1.32  | 1.67  | 1.55  | 1.27  | 1.38                                                             | 1.62  | 1.26  | 1.36  | 1.61  |
| 4   | Miyagi     | 1.00                                                           | 1.21  | 1.02  | 1.06  | 1.75  | 1.48                                                             | 0.71  | 1.39  | 1.32  | 1.27  |
| 5   | Akita      | 1.46                                                           | 1.69  | 1.34  | 1.77  | 1.75  | 0.77                                                             | 1.77  | 1.48  | 1.50  | 1.55  |
| 6   | Yamagata   | 1.09                                                           | 0.98  | 1.71  | 1.29  | 1.43  | 1.05                                                             | 0.82  | 1.26  | 0.73  | 0.35  |
| 7   | Fukushima  | 1.72                                                           | 1.85  | 1.48  | 1.48  | 1.92  | 1.44                                                             | 1.23  | 1.27  | 1.37  | 1.24  |
| 8   | Ibaraki    | 1.07                                                           | 0.77  | 0.63  | 0.69  | 0.66  | 1.52                                                             | 0.50  | 0.78  | 1.00  | 0.81  |
| 9   | Tochigi    | 0.87                                                           | 0.84  | 1.15  | 1.09  | 1.18  | 0.58                                                             | 0.86  | 1.11  | 0.70  | 0.98  |
| 10  | Gunma      | 0.80                                                           | 0.62  | 0.54  | 0.75  | 0.80  | 0.73                                                             | 0.54  | 0.78  | 0.44  | 0.62  |
| 11  | Saitama    | -0.40                                                          | -0.24 | -0.25 | -0.56 | -0.40 | 0.22                                                             | -0.38 | -0.05 | -0.42 | -0.60 |
| 12  | Chiba      | -0.20                                                          | -0.27 | -0.12 | -0.33 | -0.06 | -0.08                                                            | 0.09  | -0.60 | -0.03 | -0.63 |
| 13  | Tokyo      | -0.38                                                          | -0.73 | -0.59 | -0.74 | -0.76 | -0.76                                                            | -0.75 | -0.87 | -0.61 | -0.89 |
| 14  | Kanagawa   | -0.44                                                          | -0.64 | -0.68 | -0.70 | -0.73 | -0.63                                                            | -0.53 | -0.79 | -0.79 | -0.52 |
| 15  | Niigata    | -0.12                                                          | -0.28 | 0.12  | 0.18  | 0.16  | 0.06                                                             | -0.32 | -0.04 | 0.08  | -0.11 |
| 16  | Toyama     | -0.44                                                          | -0.63 | -0.13 | -0.11 | -0.15 | -0.75                                                            | -0.34 | -0.69 | -0.11 | -0.54 |
| 17  | Ishikawa   | -0.54                                                          | -0.65 | -0.13 | -0.57 | -0.27 | -0.64                                                            | -0.46 | -0.75 | -0.36 | -0.51 |
| 18  | Fukui      | -0.59                                                          | -0.42 | -0.61 | -0.74 | -0.98 | -0.40                                                            | -0.59 | -0.74 | -0.95 | -0.86 |
| 19  | Yamanashi  | 0.22                                                           | 0.21  | 0.51  | 0.23  | 0.50  | -0.04                                                            | 0.09  | 0.25  | 0.22  | 0.45  |
| 20  | Nagano     | -0.41                                                          | -0.27 | -0.54 | -0.47 | -0.58 | -0.34                                                            | -0.84 | -0.88 | -0.52 | -0.86 |
| 21  | Gifu       | 0.04                                                           | -0.41 | -0.69 | -0.70 | -0.46 | -0.64                                                            | -0.64 | -0.76 | -0.99 | -0.50 |
| 22  | Shizuoka   | -0.52                                                          | -0.42 | -0.33 | -0.67 | -0.74 | -0.48                                                            | -0.69 | -0.65 | -0.67 | -0.21 |
| 23  | Aichi      | -0.91                                                          | -0.44 | -0.71 | -0.78 | -0.62 | -0.86                                                            | -1.23 | -0.47 | -0.96 | -0.34 |
| 24  | Mie        | -0.13                                                          | -0.30 | -0.62 | -0.17 | -0.82 | 0.06                                                             | -0.35 | -0.16 | -0.16 | -0.65 |
| 25  | Shiga      | -0.97                                                          | -0.86 | -1.06 | -1.17 | -1.02 | -0.86                                                            | -0.64 | -0.77 | -0.96 | -1.08 |
| 26  | Kyoto      | -1.03                                                          | -1.03 | -0.89 | -0.99 | -0.96 | -0.98                                                            | -1.10 | -0.89 | -1.03 | -1.11 |
| 27  | Osaka      | -0.60                                                          | -0.81 | -0.53 | -1.08 | -0.53 | -0.86                                                            | -0.91 | -0.68 | -0.28 | -0.72 |
| 28  | Hyogo      | -1.03                                                          | -1.14 | -1.26 | -0.90 | -1.12 | -0.63                                                            | -1.01 | -0.95 | -1.09 | -1.17 |
| 29  | Nara       | -0.65                                                          | -0.66 | -0.81 | -0.69 | -0.73 | -0.50                                                            | -0.69 | -0.43 | -0.54 | -0.86 |
| 30  | Wakayama   | -0.16                                                          | -0.23 | -0.55 | -0.30 | -0.31 | -0.46                                                            | -0.02 | 0.02  | 0.04  | -0.08 |
| 31  | Tottori    | -0.71                                                          | -0.37 | -0.48 | -0.56 | -0.65 | -0.53                                                            | -0.54 | -0.60 | -0.16 | -0.42 |
| 32  | Shimane    | -1.13                                                          | -0.84 | -0.61 | -0.33 | -0.69 | -0.47                                                            | -0.52 | -0.56 | 0.03  | -0.49 |
| 33  | Okayama    | -0.68                                                          | -0.45 | -0.23 | -0.59 | -0.64 | -0.11                                                            | -0.13 | 0.01  | -0.57 | -0.52 |
| 34  | Hiroshima  | -0.63                                                          | -0.73 | -0.46 | -0.46 | -0.50 | -0.19                                                            | -0.44 | -0.36 | -0.48 | -0.39 |
| 35  | Yamaguchi  | -0.06                                                          | -0.06 | -0.78 | -0.53 | -0.53 | -0.57                                                            | -0.44 | -0.90 | -0.75 | -0.49 |
| 36  | Tokushima  | 2.09                                                           | 0.24  | 0.74  | 0.96  | 0.92  | 1.29                                                             | 0.60  | 0.74  | 0.61  | 0.64  |
| 37  | Kagawa     | -0.05                                                          | 0.43  | -0.16 | 0.02  | -0.22 | 0.53                                                             | 0.45  | 0.22  | -0.38 | 0.45  |
| 38  | Ehime      | -0.13                                                          | -0.24 | -0.38 | -0.28 | -0.11 | -0.22                                                            | 0.22  | -0.75 | -0.41 | -0.25 |
| 39  | Kochi      | 0.33                                                           | 0.03  | 0.01  | -0.28 | -0.08 | -0.53                                                            | 0.42  | 0.02  | -0.21 | -0.02 |
| 40  | Fukuoka    | -0.37                                                          | -0.23 | -0.74 | -0.26 | -0.62 | -0.55                                                            | -0.48 | -0.61 | -0.27 | -0.12 |
| 41  | Saga       | -0.26                                                          | -0.23 | -0.38 | -0.31 | -0.21 | -0.39                                                            | -0.15 | -0.02 | -0.58 | 0.08  |
| 42  | Nagasaki   | -0.23                                                          | -0.13 | -0.46 | -0.22 | -0.48 | -0.24                                                            | -0.24 | -0.11 | -0.46 | -0.31 |
| 43  | Kumamoto   | 0.02                                                           | 0.49  | 0.39  | 0.66  | 0.78  | 0.26                                                             | 0.67  | 0.50  | 0.69  | 0.30  |
| 44  | Oita       | -0.08                                                          | 0.53  | 0.45  | 0.21  | -0.17 | 0.01                                                             | 0.95  | 0.43  | 0.58  | 0.78  |
| 45  | Miyazaki   | 0.12                                                           | -0.01 | 0.23  | 0.26  | 0.13  | 0.07                                                             | 0.09  | 0.39  | 0.69  | 0.38  |
| 46  | Kagoshima  | -0.34                                                          | -0.17 | -0.09 | -0.49 | -0.24 | -0.20                                                            | -0.04 | 0.13  | 0.13  | 0.10  |
| 47  | Okinawa    | 0.36                                                           | 0.02  | 0.36  | 0.64  | 0.38  | 0.54                                                             | 0.36  | 0.65  | 0.34  | 0.72  |

**Table S4.** Age at Peak Height Velocity (PHV) in each prefecture.

| No. | Prefecture | Age at PHV (y) |        |
|-----|------------|----------------|--------|
|     |            | Male           | Female |
| 1   | Hokkaido   | 11.63          | 9.40   |
| 2   | Aomori     | 11.66          | 9.32   |
| 3   | Iwate      | 11.66          | 9.39   |
| 4   | Miyagi     | 11.68          | 9.52   |
| 5   | Akita      | 11.56          | 9.37   |
| 6   | Yamagata   | 11.73          | 9.57   |
| 7   | Fukushima  | 11.61          | 9.47   |
| 8   | Ibaraki    | 11.67          | 9.52   |
| 9   | Tochigi    | 11.70          | 9.51   |
| 10  | Gunma      | 11.73          | 9.56   |
| 11  | Saitama    | 11.84          | 9.50   |
| 12  | Chiba      | 11.77          | 9.56   |
| 13  | Tokyo      | 11.78          | 9.69   |
| 14  | Kanagawa   | 11.85          | 9.71   |
| 15  | Niigata    | 11.77          | 9.51   |
| 16  | Toyama     | 11.76          | 9.51   |
| 17  | Ishikawa   | 11.83          | 9.68   |
| 18  | Fukui      | 11.85          | 9.46   |
| 19  | Yamanashi  | 11.93          | 9.46   |
| 20  | Nagano     | 11.83          | 9.71   |
| 21  | Gifu       | 11.80          | 9.73   |
| 22  | Shizuoka   | 11.84          | 9.55   |
| 23  | Aichi      | 11.85          | 9.67   |
| 24  | Mie        | 11.86          | 9.61   |
| 25  | Shiga      | 11.97          | 9.57   |
| 26  | Kyoto      | 12.01          | 9.68   |
| 27  | Osaka      | 11.92          | 9.63   |
| 28  | Hyogo      | 11.92          | 9.62   |
| 29  | Nara       | 11.79          | 9.56   |
| 30  | Wakayama   | 11.88          | 9.58   |
| 31  | Tottori    | 11.90          | 9.60   |
| 32  | Shimane    | 11.84          | 9.62   |
| 33  | Okayama    | 11.76          | 9.76   |
| 34  | Hiroshima  | 11.74          | 9.66   |
| 35  | Yamaguchi  | 11.95          | 9.60   |
| 36  | Tokushima  | 11.75          | 9.52   |
| 37  | Kagawa     | 11.73          | 9.57   |
| 38  | Ehime      | 11.72          | 9.60   |
| 39  | Kochi      | 11.67          | 9.80   |
| 40  | Fukuoka    | 11.80          | 9.43   |
| 41  | Saga       | 11.92          | 9.44   |
| 42  | Nagasaki   | 11.89          | 9.58   |
| 43  | Kumamoto   | 11.73          | 9.59   |
| 44  | Oita       | 11.73          | 9.45   |
| 45  | Miyazaki   | 11.70          | 9.39   |
| 46  | Kagoshima  | 11.77          | 9.46   |
| 47  | Okinawa    | 11.63          | 9.33   |
